# Supplementary material for: Influence of the catalyst surface chemistry on the electrochemical self-coupling of biomass-derived benzaldehyde into hydrobenzoin
Source: Royal Society of Chemistry journal article supplement (doi:10.1039/d4ya00334a), 2024-01-01
Supplement: d4ya00334a1.pdf [file d4ya00334a1.pdf]

## Supporting Information

### **Influence of the catalyst surface chemistry on the electrochemical self-coupling of biomass-derived benzaldehyde into hydrobenzoin**

Li Gong<sup>1,2</sup>, Shiling Zhao<sup>3</sup> Jing Yu<sup>1,4</sup>, Junshan Li<sup>5</sup>, Jordi Arbiol<sup>4,8</sup>, Tanja Kallio<sup>6</sup>, Mariano Calcabrini<sup>7</sup>, Paulina R. Martínez-Alanis<sup>1\*</sup>, Maria Ibáñez<sup>7</sup>, Andreu Cabot<sup>1,8\*</sup>

1\*. Catalonia Institute for Energy Research – IREC Sant Adrià de Besòs, Barcelona 08930, Spain E-mail: pmartinez@irec.cat, acabot@irec.cat

2. University of Barcelona, Barcelona 08028, Spain.

3. School of Petrochemical Engineering, Lanzhou University of Technology, Lanzhou, 730050, China.

4. Catalan Institute of Nanoscience and Nanotechnology (ICN2), CSIC and BIST, Campus UAB, Bellaterra, 08193, Barcelona, Spain.

5. Institute of Advanced Study, Chengdu University, Chengdu, 610106, China

6. Department of Chemistry and Materials Science, Aalto University School of Chemical Engineering, P.O. Box 16100, FI-00076 Aalto, Finland.

7. IST Austria, Am Campus 1, Klosterneuburg, 3400 Austria

8. ICREA, Pg. Lluís Companys 23, 08010, Barcelona, Spain

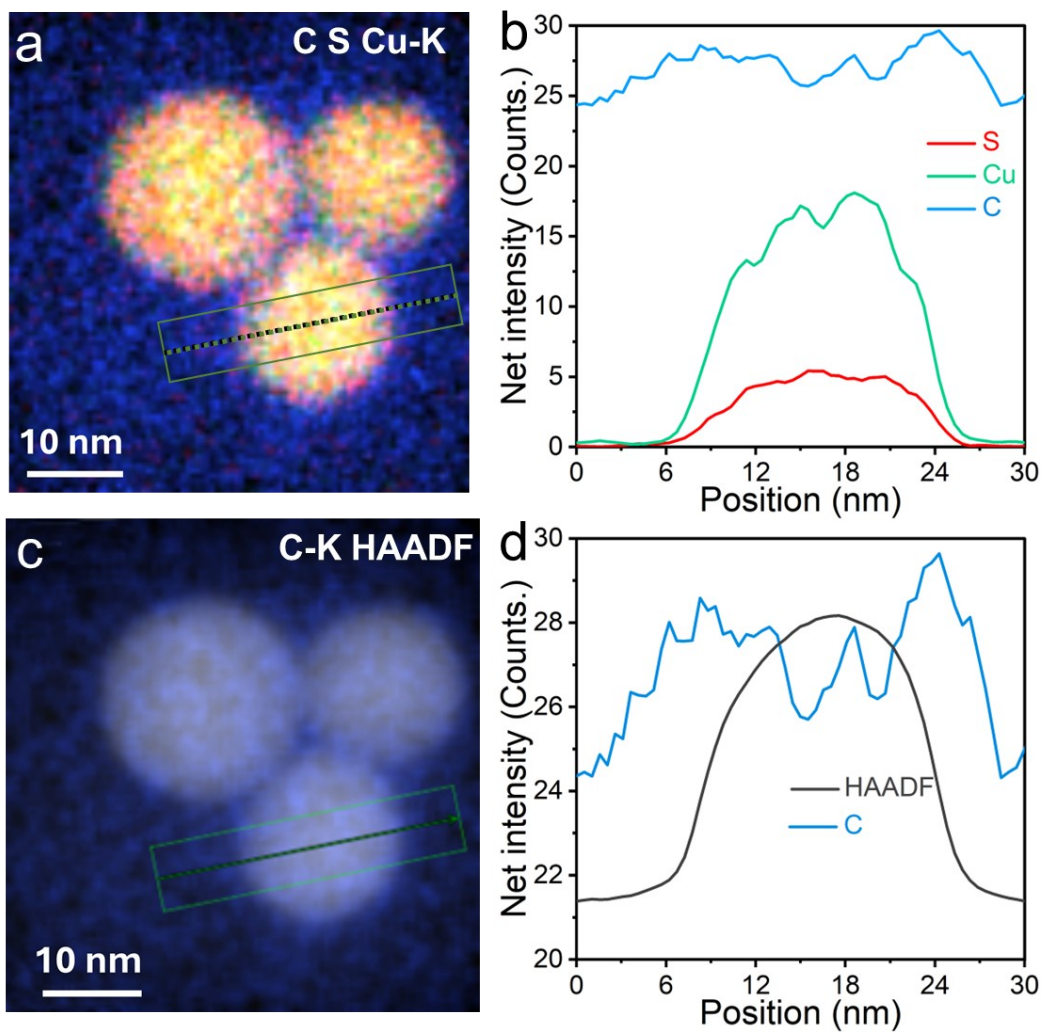

**Figure S1.** (a) STEM-EDS chemical composition map of different elements of  $\text{Cu}_2\text{S}$ -OAm NPs; (b) EDS linear profile of detected elements of  $\text{Cu}_2\text{S}$ -OAm NPs; (c) STEM-HAADF image of  $\text{Cu}_2\text{S}$ -OAm and element C mapping and (d) its EDS linear profile.

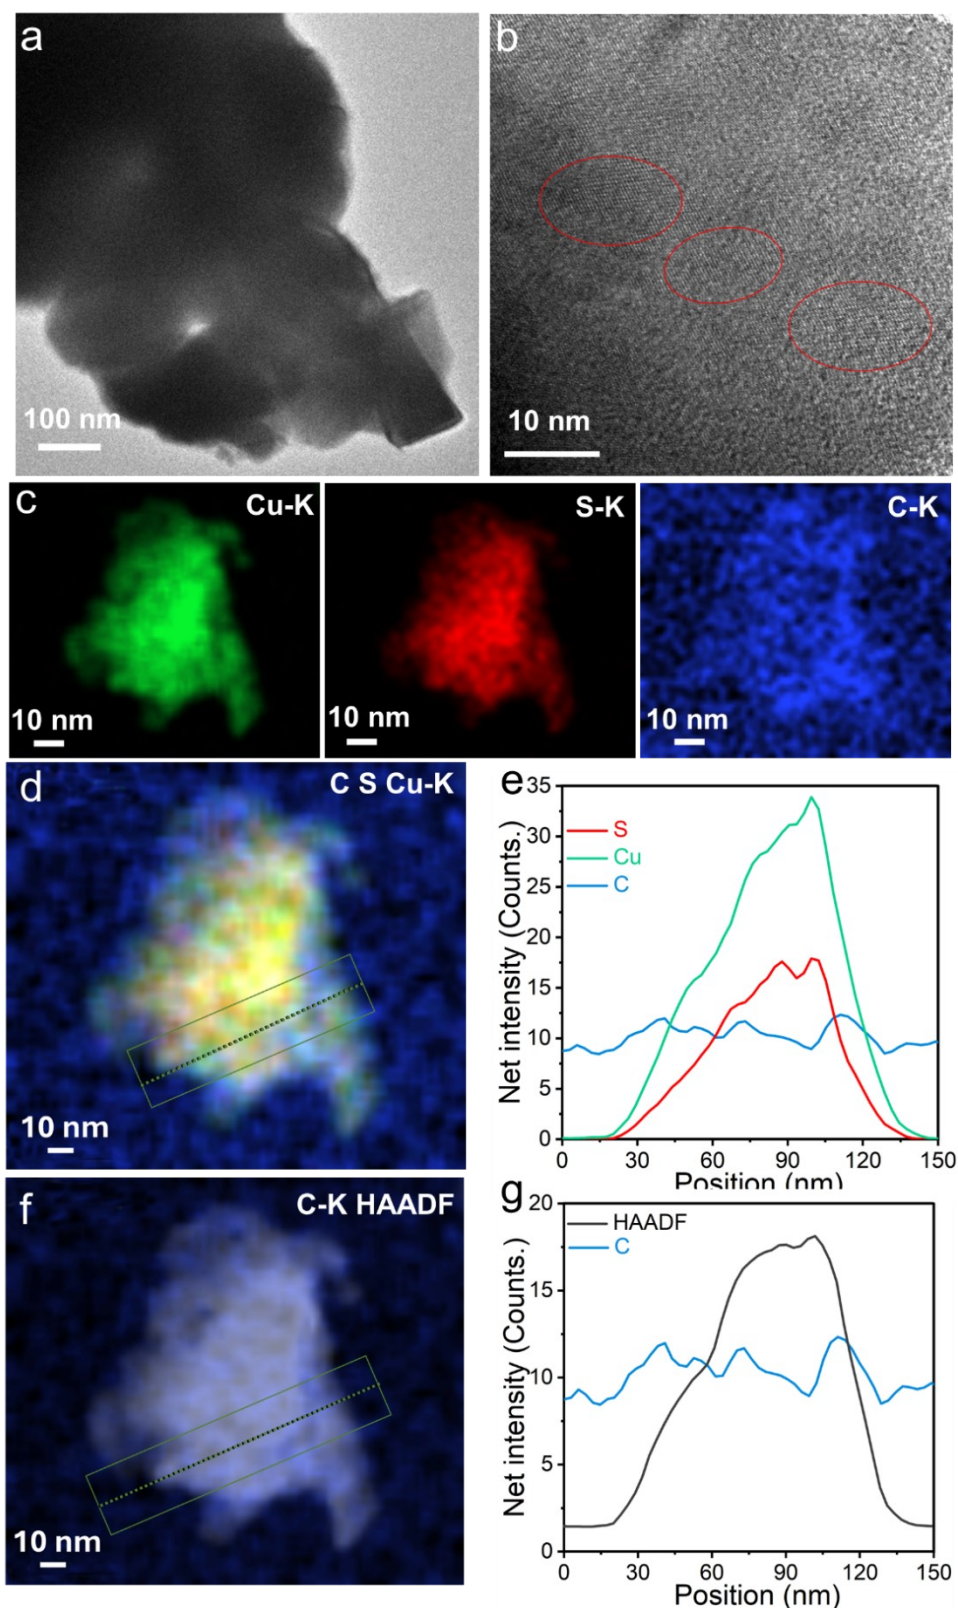

**Figure S2.** Structural and chemical characterization of  $\text{Cu}_2\text{S}$ . (a) TEM image; (b) High magnification TEM image; (c) STEM-EDS chemical composition maps of  $\text{Cu}_2\text{S}$ ; (d) STEM-EDS chemical composition map of different elements; (e) EDS linear profile of detected elements; (f) STEM-HAADF image of  $\text{Cu}_2\text{S}$  and element C mapping and (g) its EDS linear profile.

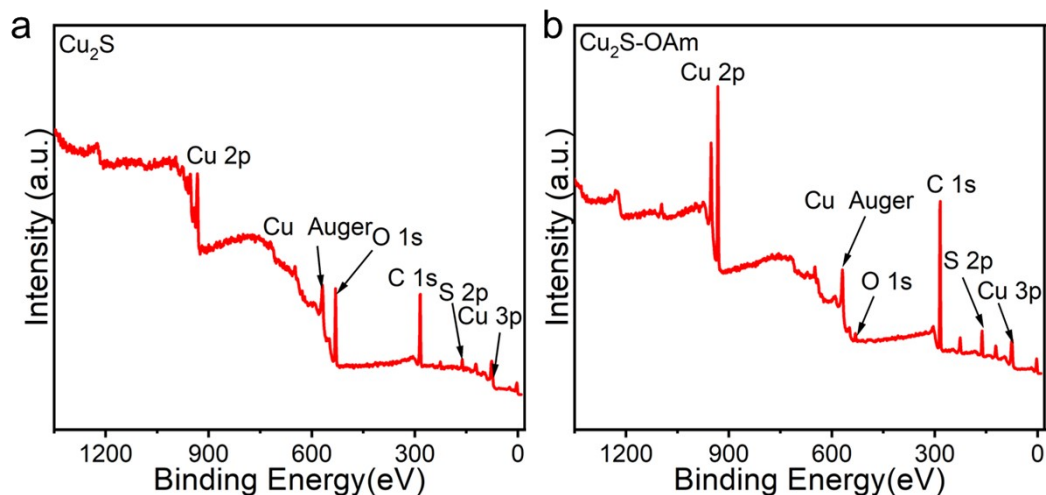

**Figure S3.** The XPS survey spectrum of  $\text{Cu}_2\text{S}$  and  $\text{Cu}_2\text{S-OAm}$ .

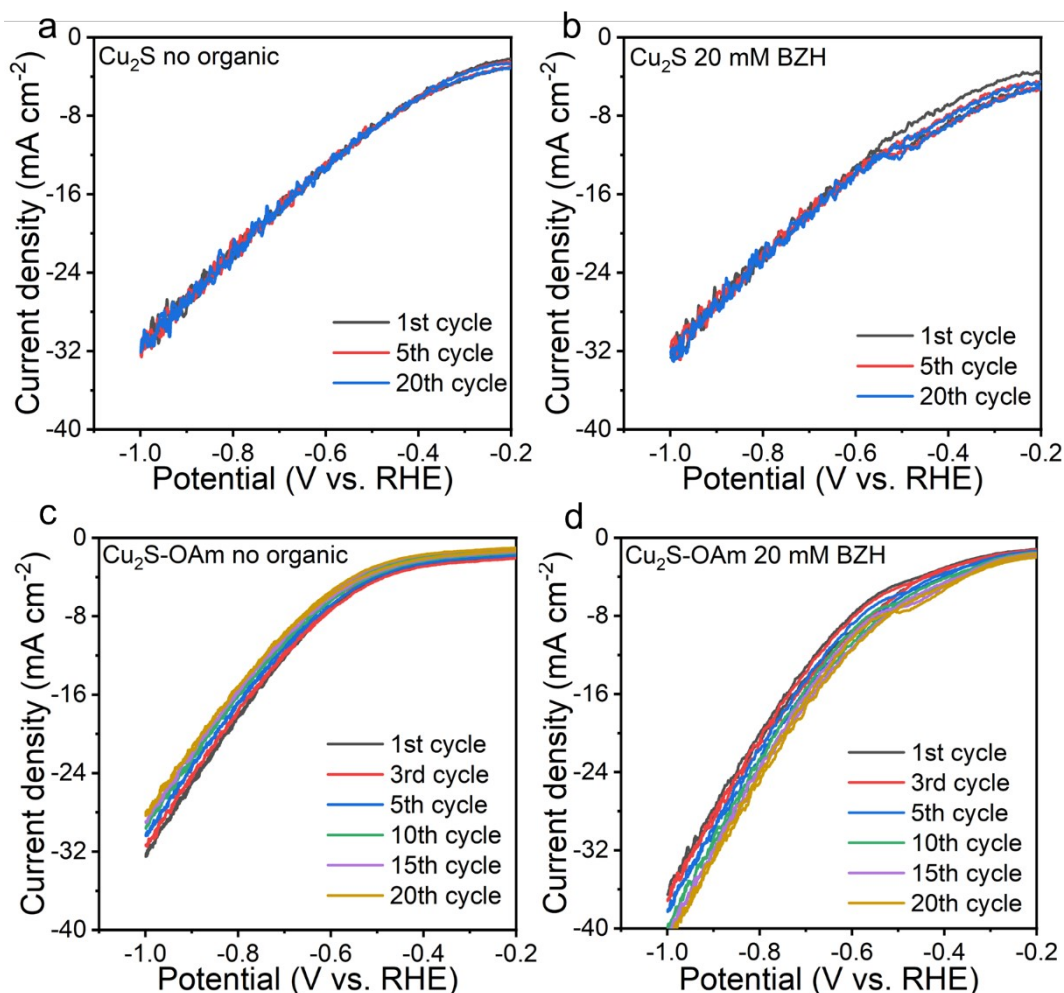

**Figure S4.** Stability tests using CV of (a)  $\text{Cu}_2\text{S}$  in 1 M sodium acetate-acetic acid electrolyte (pH=5.2); (b)  $\text{Cu}_2\text{S}$  in 1 M sodium acetate-acetic acid electrolyte (pH=5.2) and 20 mM BZH; (c)  $\text{Cu}_2\text{S-OAm}$  in 1 M sodium acetate-acetic acid electrolyte (pH=5.2); (d)  $\text{Cu}_2\text{S-OAm}$  in 1 M sodium acetate-acetic acid electrolyte (pH=5.2) and 20 mM BZH.

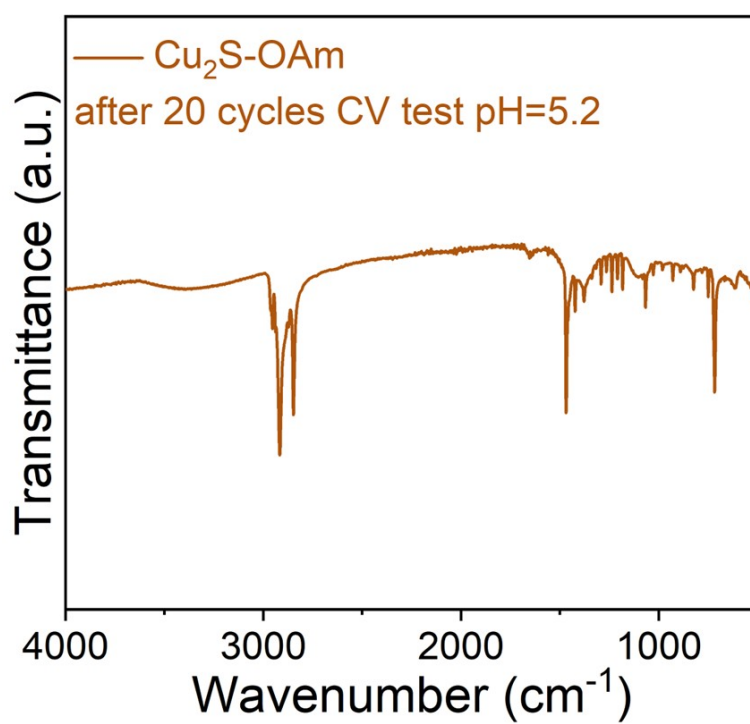

**Figure S5.** FTIR spectrum of Cu<sub>2</sub>S-OAm after 20 cycles CV tests in 1 M sodium acetate-acetic acid electrolyte (pH=5.2) and 20 mM BZH.

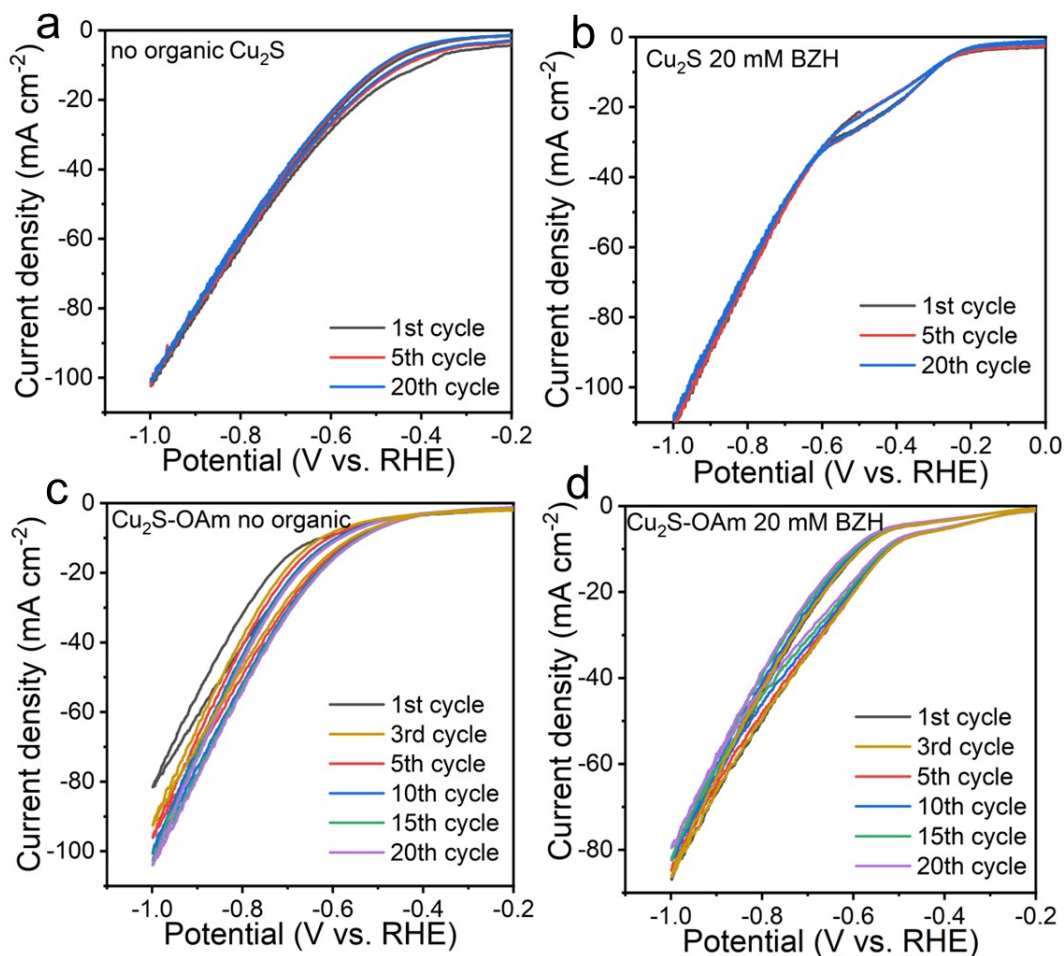

**Figure S6.** Stability tests of Cyclic voltammetry (CV) of (a)  $\text{Cu}_2\text{S}$  in 1 M potassium carbonate-potassium bicarbonate electrolyte (pH=9.0); (b)  $\text{Cu}_2\text{S}$  in 1 M potassium carbonate-potassium bicarbonate electrolyte (pH=9.0) and 20 mM BZH; (c)  $\text{Cu}_2\text{S-OAm}$  in 1 M potassium carbonate-potassium bicarbonate electrolyte (pH=9.0); (d)  $\text{Cu}_2\text{S-OAm}$  in 1 M potassium carbonate-potassium bicarbonate electrolyte (pH=9.0) and 20 mM BZH.

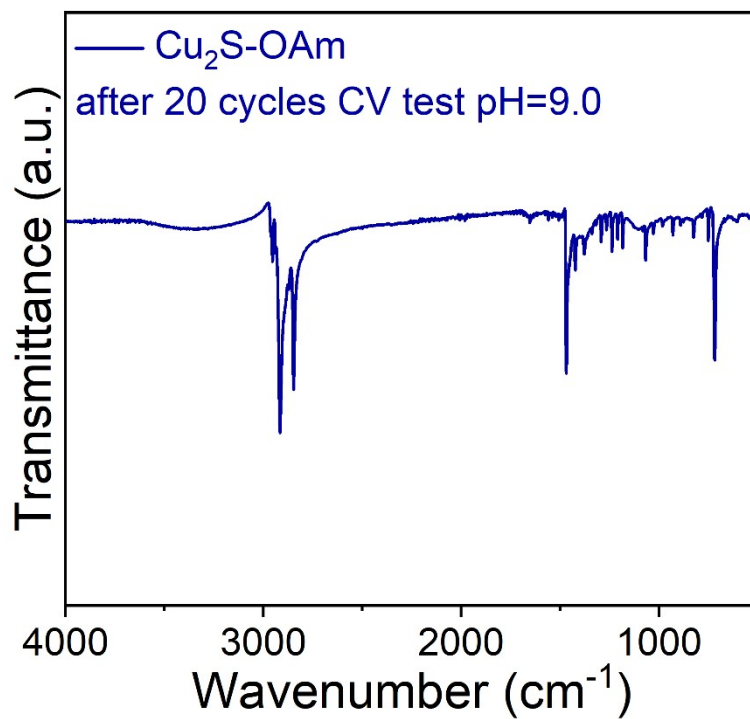

**Figure S7.** FTIR spectrum of Cu<sub>2</sub>S-OAm after 20 cycles CV tests in 1 M potassium carbonate-potassium bicarbonate electrolyte (pH=9.0) and 20 mM BZH.

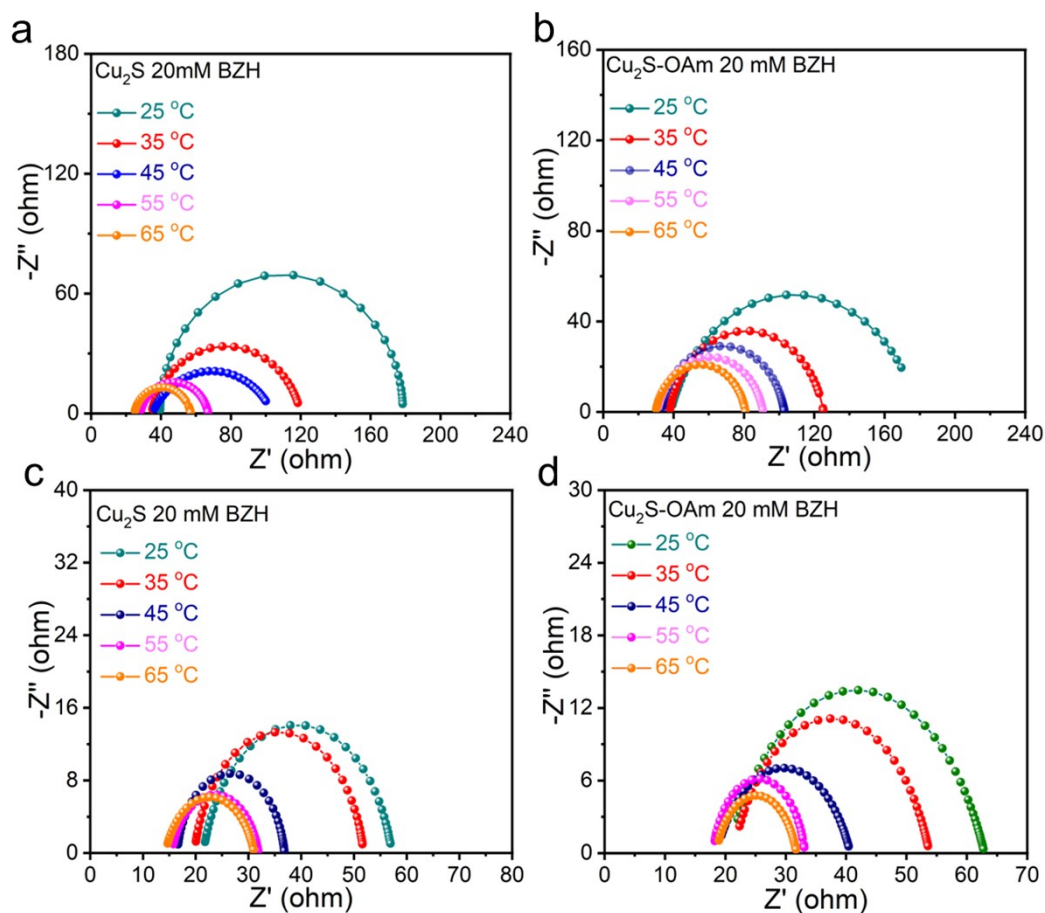

**Figure S8.** Nyquist plot of electrode material (a)  $\text{Cu}_2\text{S}$ ; (b)  $\text{Cu}_2\text{S-OAm}$  in 1 M sodium acetate-acetic acid electrolyte (pH=5.2) and 20 mM BZH at different temperature; (c)  $\text{Cu}_2\text{S}$ ; (d)  $\text{Cu}_2\text{S-OAm}$  in 1 M potassium carbonate-potassium bicarbonate electrolyte (pH=9.0) and 20 mM BZH.

**Table S1.** Summary of conversion of BZH at constant voltage -0.8 V vs. RHE at different pH on different electrode materials. at temperature of 25 °C.

|         | Electrode materials       | BZH concentration (mM) | BZH Conv. % | HDB sel. % | BA sel. % |
|---------|---------------------------|------------------------|-------------|------------|-----------|
| pH= 5.2 | $\text{Cu}_2\text{S}$     | 20                     | 7           | 62         | 38        |
|         | $\text{Cu}_2\text{S}$     | 40                     | 12          | 60         | 40        |
|         | $\text{Cu}_2\text{S-OAm}$ | 20                     | 8           | 88         | 12        |
|         | $\text{Cu}_2\text{S-OAm}$ | 40                     | 15          | 86         | 14        |
| pH= 9.0 | $\text{Cu}_2\text{S}$     | 20                     | 31          | 42         | 58        |
|         | $\text{Cu}_2\text{S}$     | 40                     | 39          | 44         | 56        |
|         | $\text{Cu}_2\text{S-OAm}$ | 20                     | 24          | 75         | 25        |



|  |                       |    |    |    |    |
|--|-----------------------|----|----|----|----|
|  | Cu <sub>2</sub> S-OAm | 40 | 30 | 77 | 23 |
|--|-----------------------|----|----|----|----|
